# Supplementary material for: Mechanical phenotyping of breast cancer using MEMS: a method to demarcate benign and cancerous breast tissues
Source: Royal Society of Chemistry journal article supplement (doi:10.1039/c4lc00594e), 2014-09-10
Supplement: c4lc00594e1.pdf [file c4lc00594e1.pdf]

## Mechanical phenotyping of breast cancer using MEMS: A method to demarcate benign and cancerous breast tissue

Hardik J. Pandya<sup>a,\*</sup>, Wenjin Chen<sup>b</sup>, Lauri A. Goodell<sup>c</sup>, David J. Foran<sup>b</sup> and Jaydev P. Desai<sup>a</sup>

\* Correspondence to: [hjpandya@umd.edu](mailto:hjpandya@umd.edu)

### Supplementary Methods

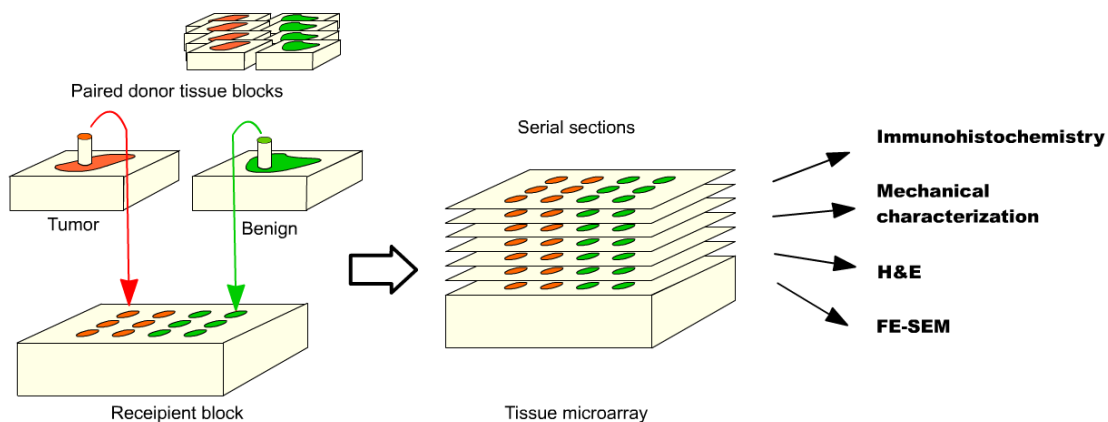

**Supplementary Fig. S1. Sample TMA preparation.** Various slices are prepared for Immunohistochemistry, mechanical characterization, H&E staining, and FE-SEM imaging.

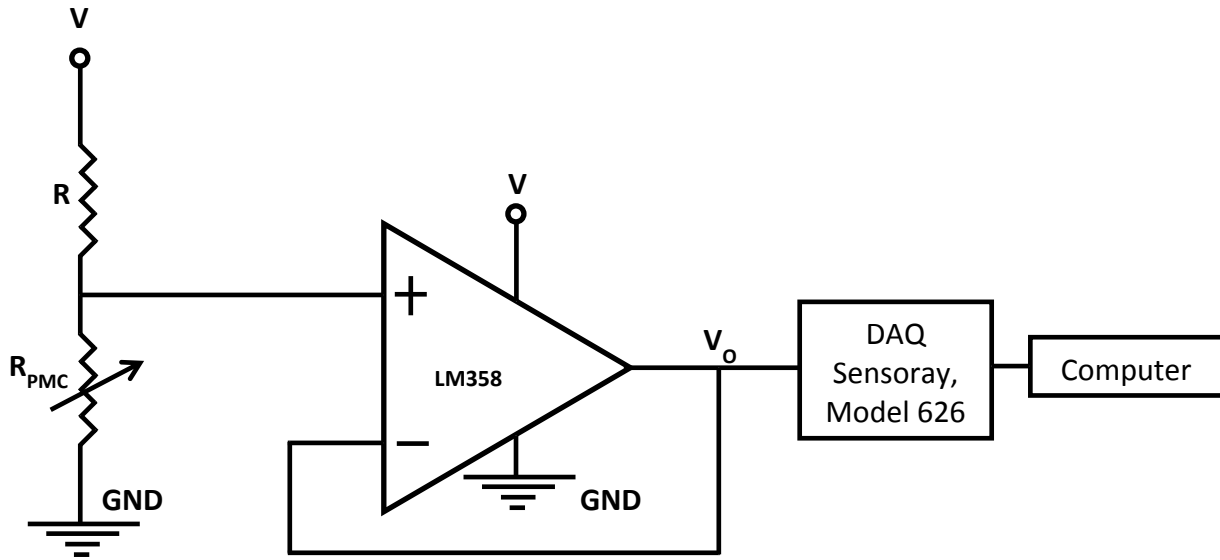

**Supplementary Fig. S2. Electronic module.** Displaying PMC output on computer.

The output voltage  $V_o$  fed to DAQ card was calculated as:

$$V_o = \frac{R_{PMC}}{(R + R_{PMC})} \times V \quad (1)$$

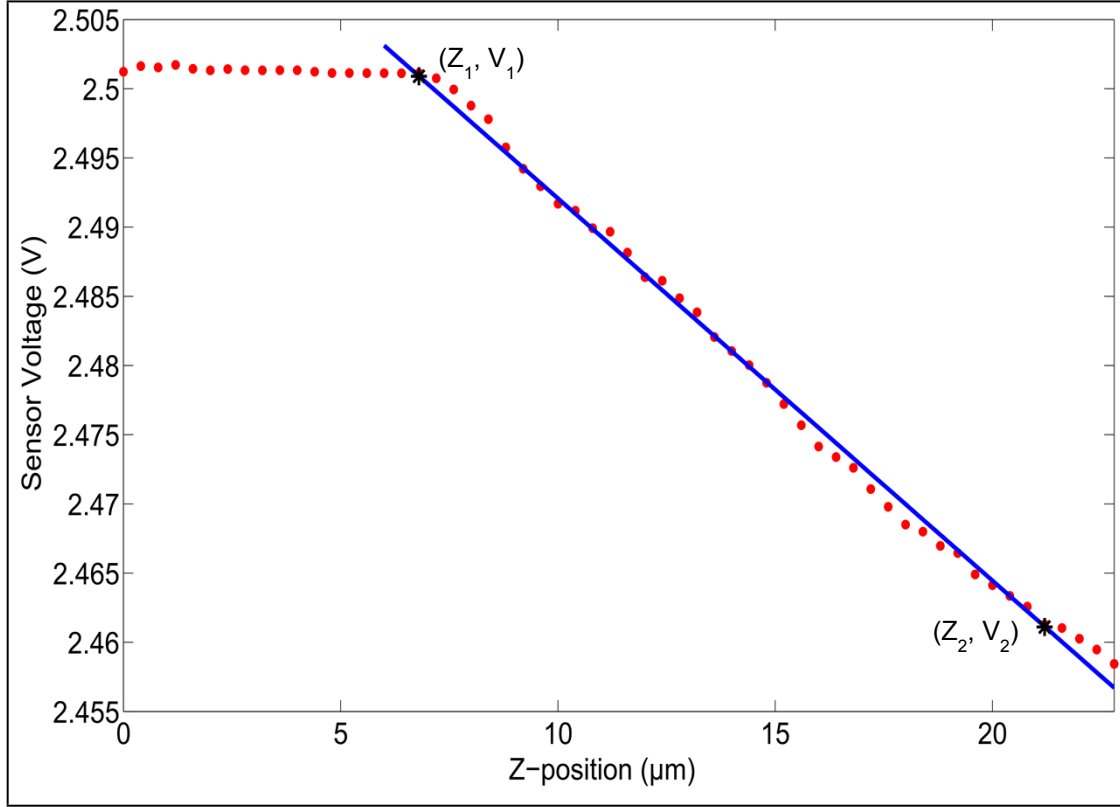

**Supplementary Fig. S3. Sensitivity measurement of the fabricated piezoresistive microcantilever.** Measuring change in voltage (V) as a function of the vertical distance (Z).

A linear regression model was used to find the correlation between the changes in the sensor reading to the sensor displacement. The goodness of fit ( $R^2$  value) was found to be 0.9956, which shows that the sensor has a linear response. The sensitivity of the sensor is given by:

$$S = \frac{V_2 - V_1}{Z_2 - Z_1} = \frac{\Delta V}{\Delta Z} = -0.0027 \text{ V}/\mu\text{m}$$

where,  $Z_1$ ,  $Z_2$ ,  $V_1$ , and  $V_2$  are  $6.8\mu\text{m}$ ,  $21.2\mu\text{m}$ ,  $2.5011\text{V}$ , and  $2.4612\text{V}$  respectively.

A

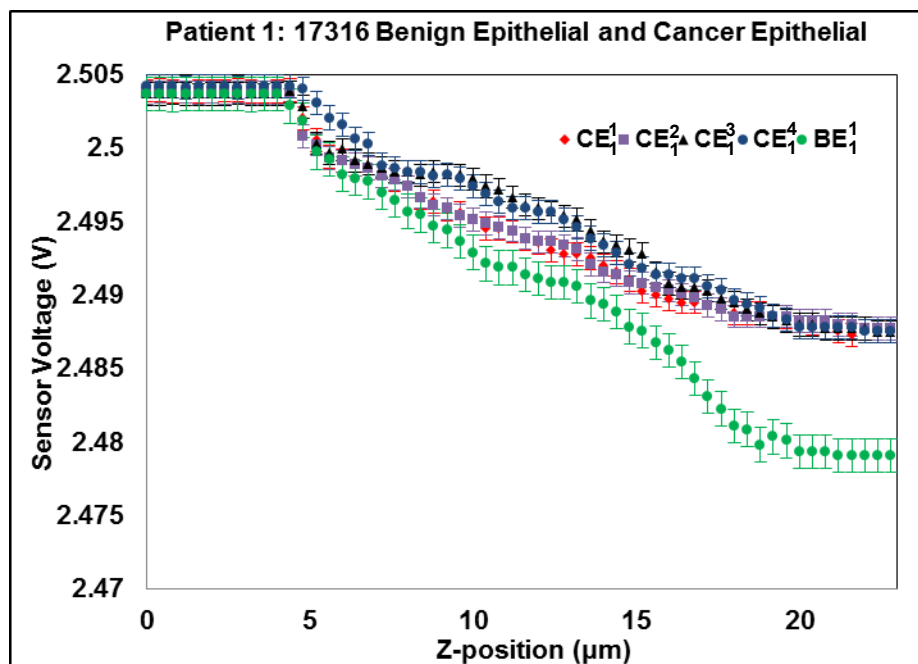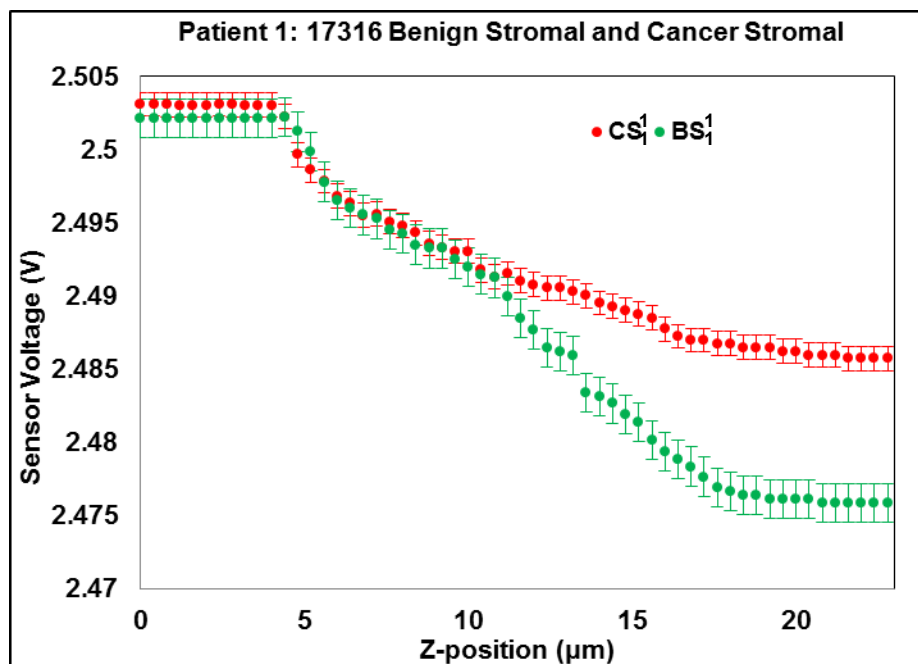

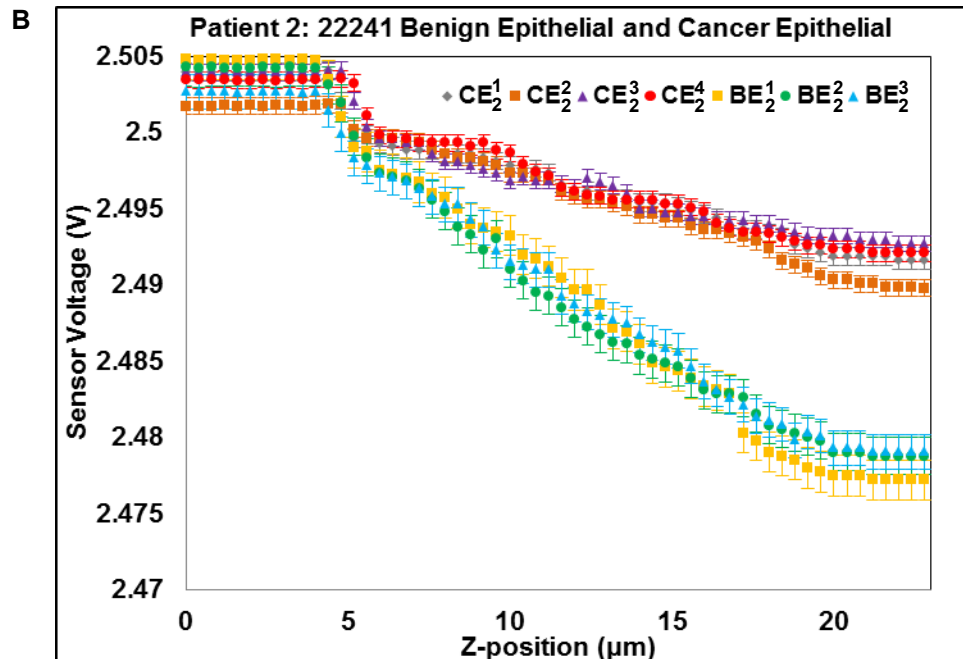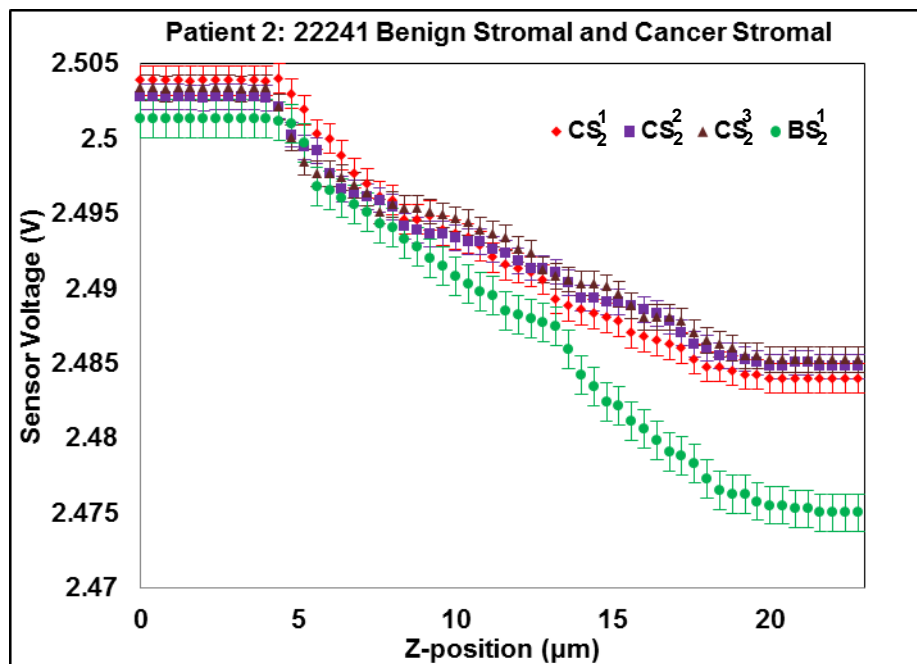

C

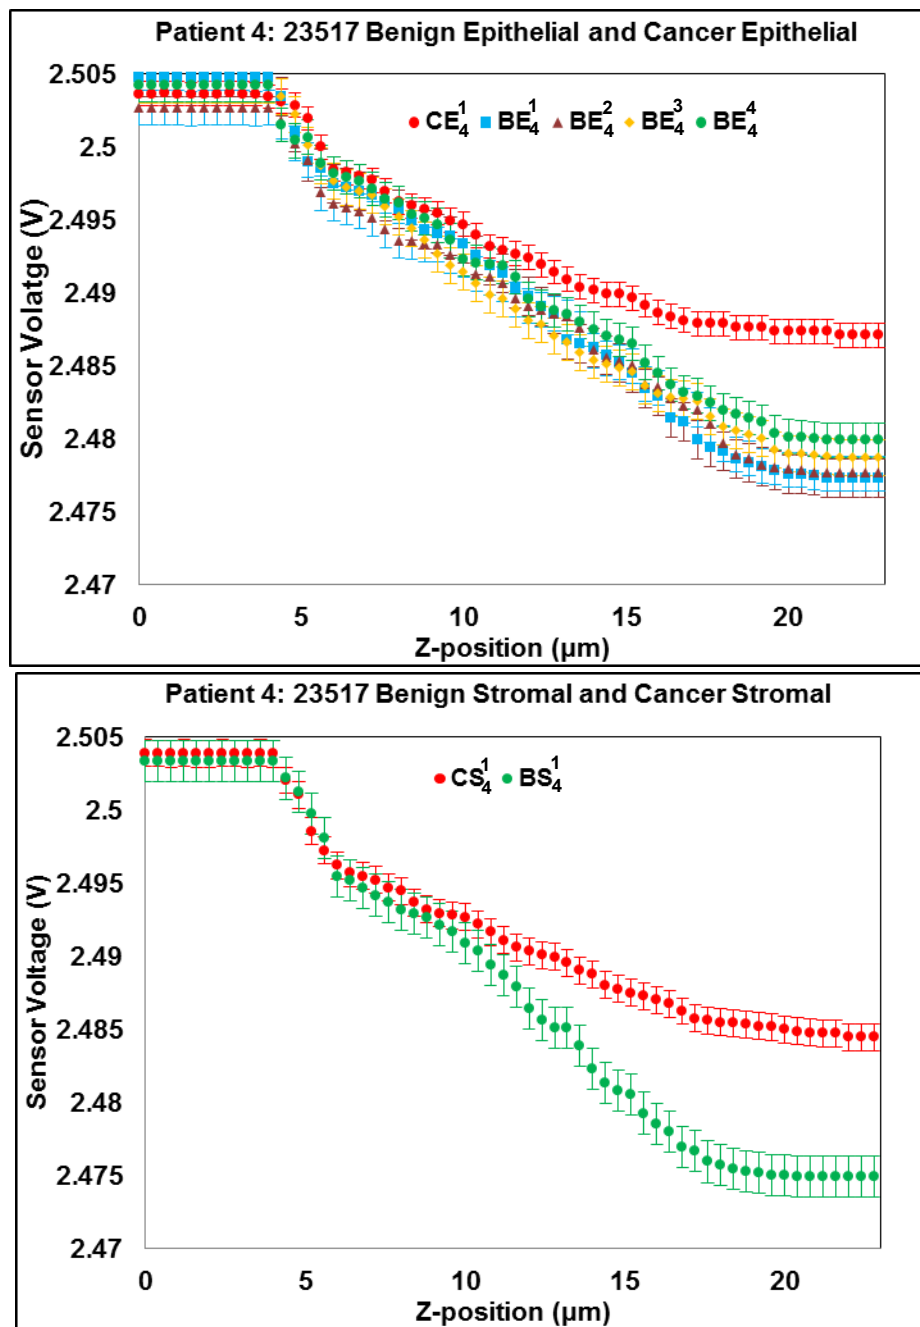

D

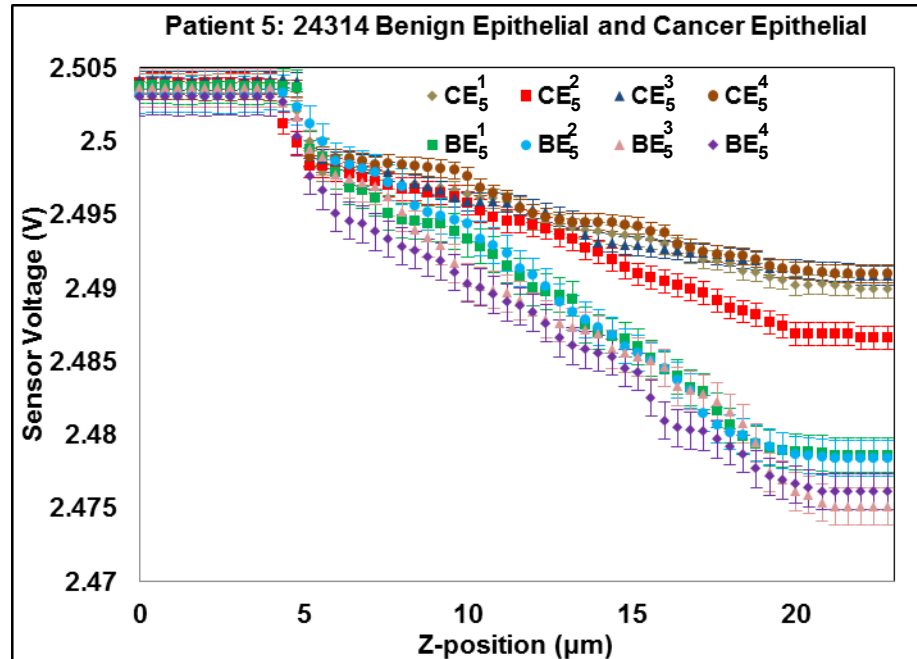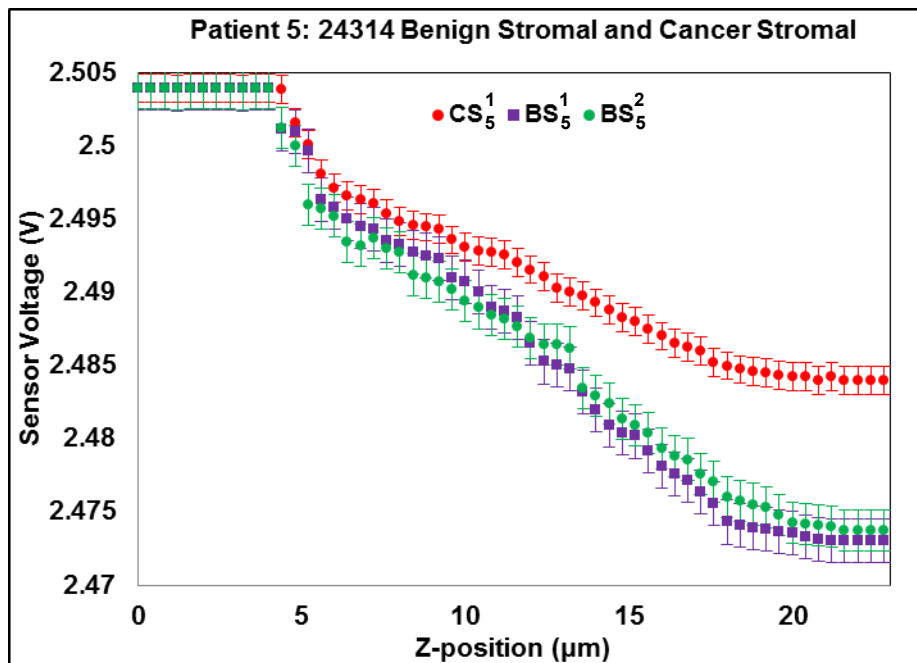

E

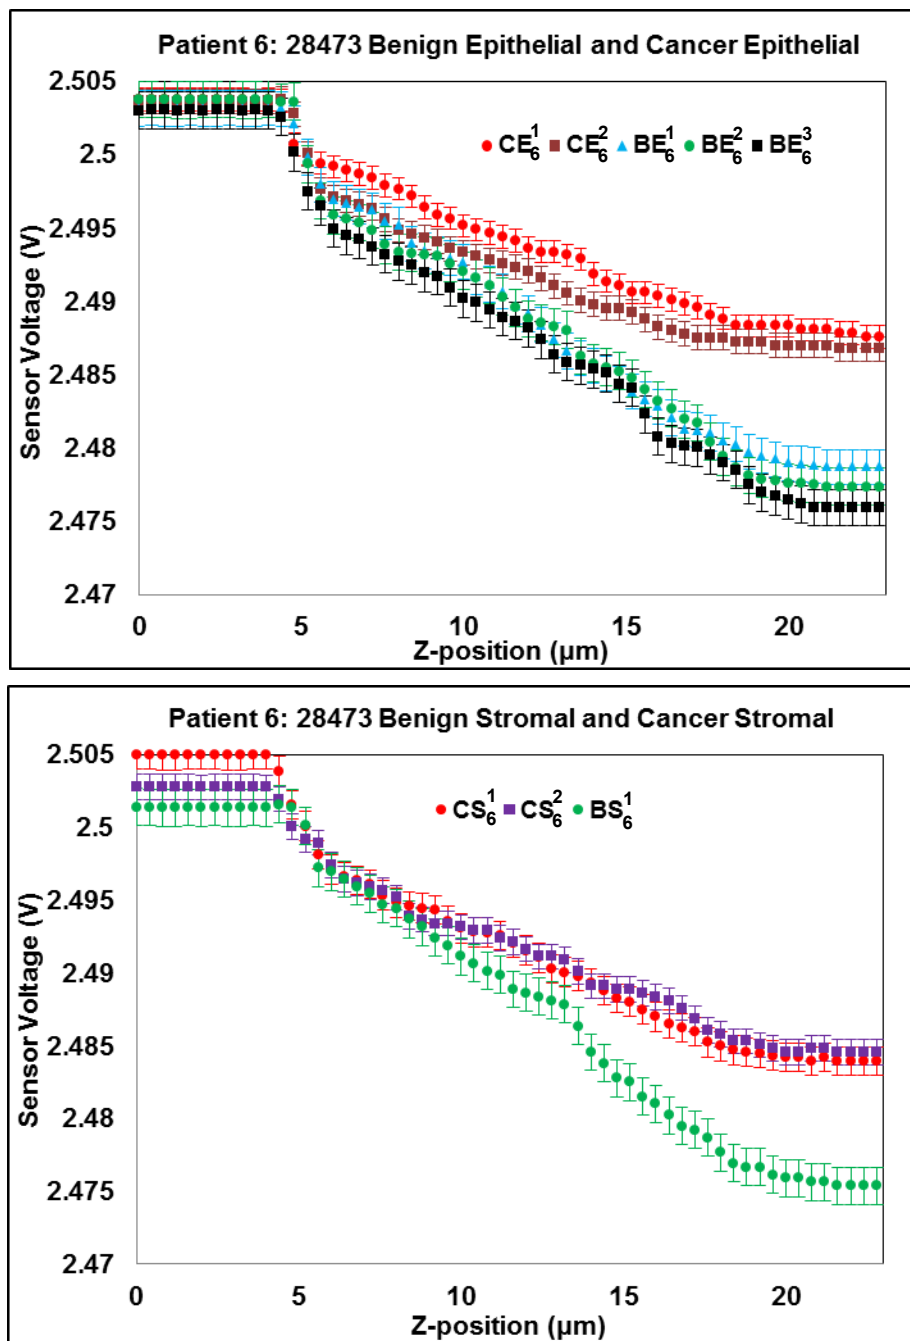



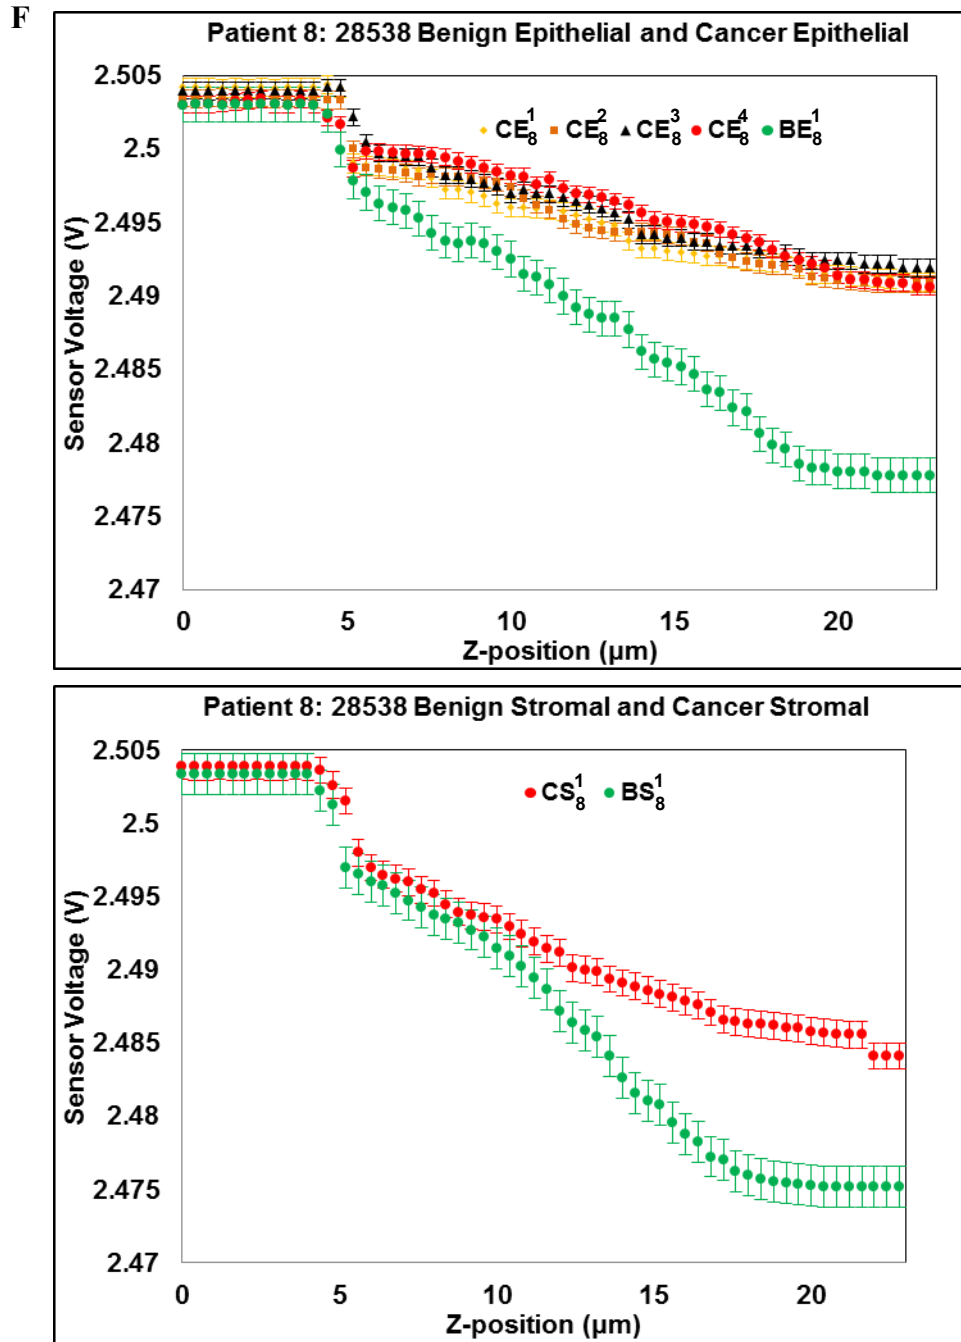

**Supplementary Fig. S4. Response of sensor on indenting epithelial and stromal regions of benign and cancerous breast tissue cores. A, patient 1, B, patient 2, C, patient 4, D, patient 5, E, patient 6, and F, patient 8.**

A

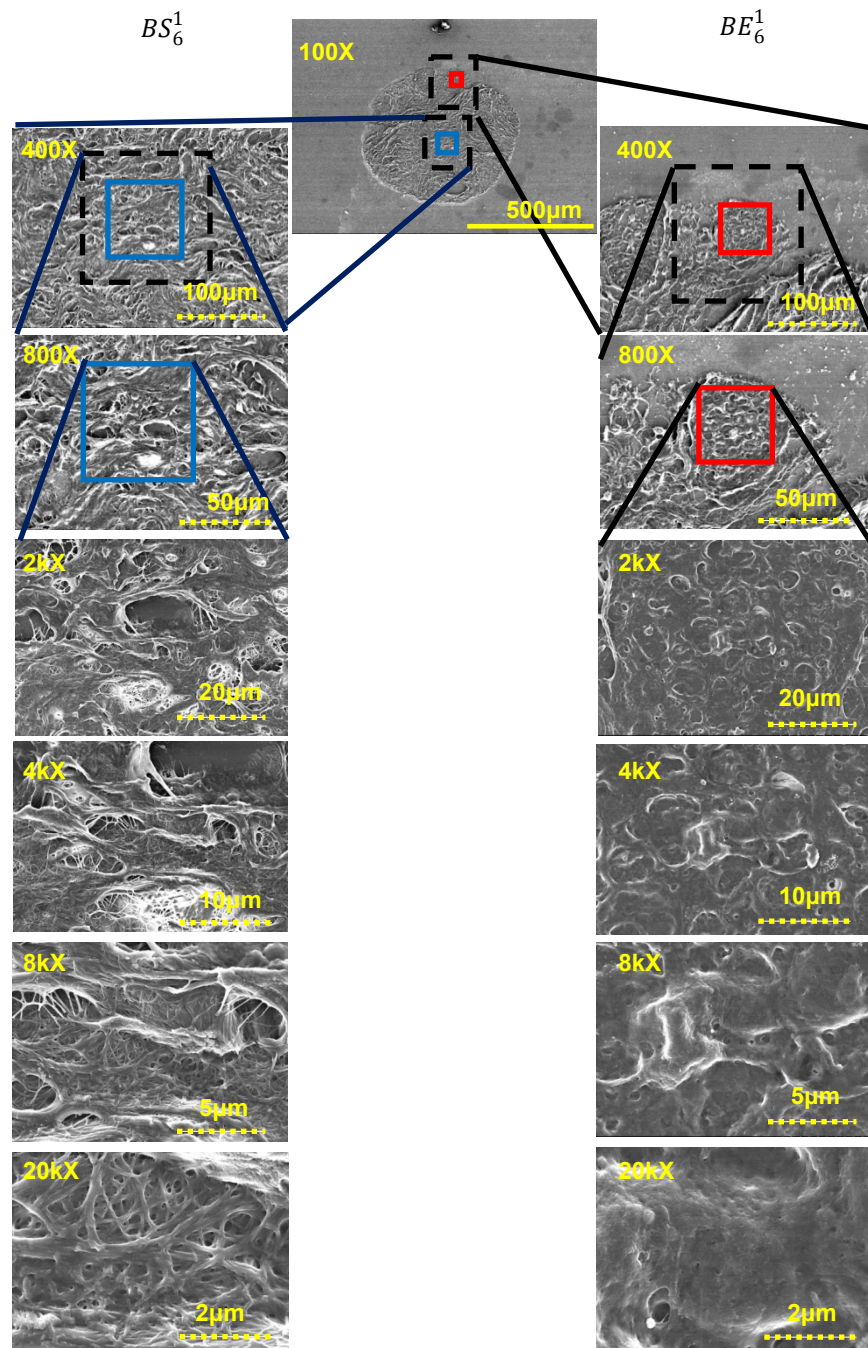

**B**

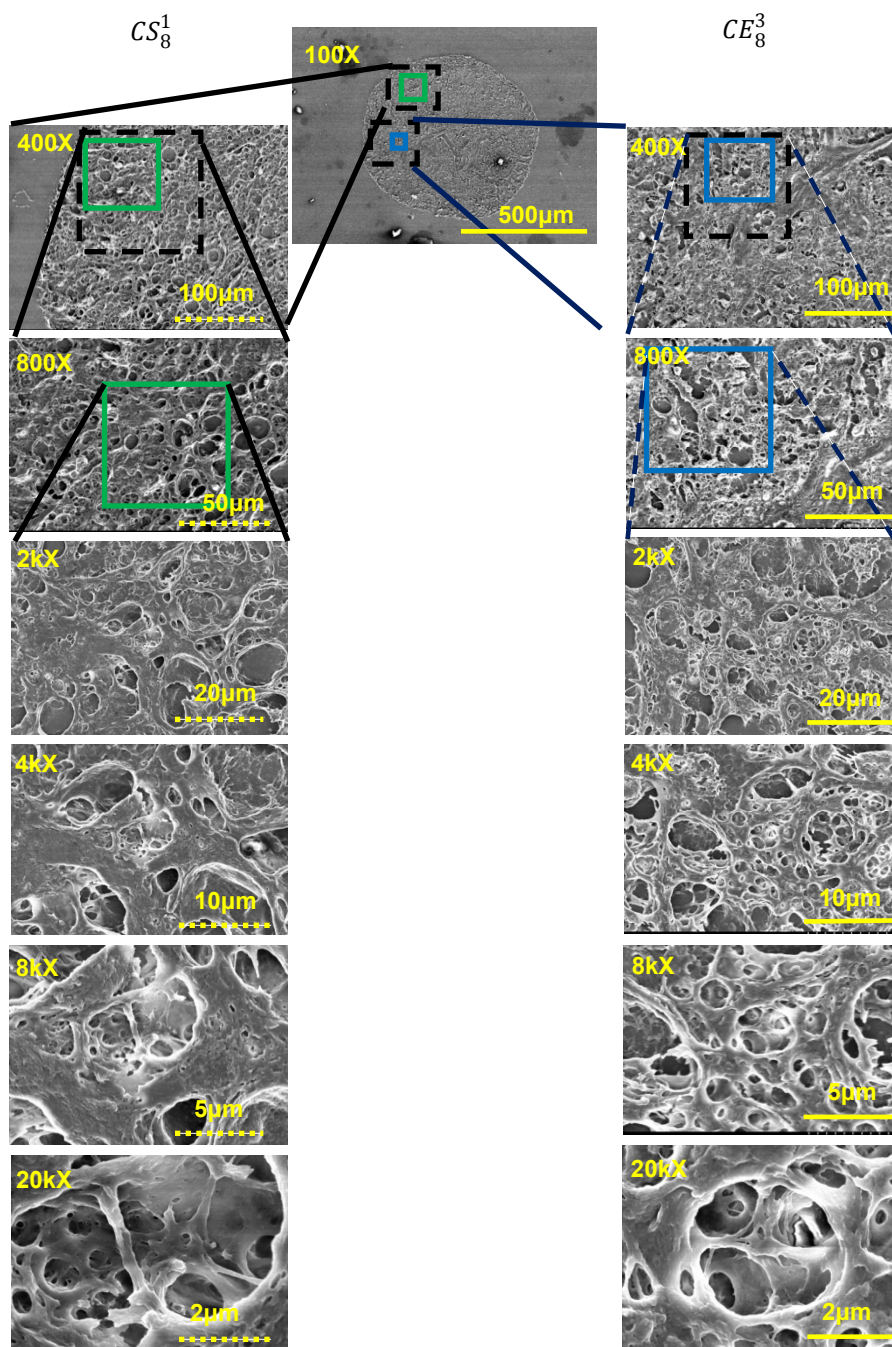

**Supplementary Fig. S5. FE-SEM of benign and cancerous breast tissue (A) specimen 6 and (B) specimen 8 at different magnifications. Studying microstructural changes from benign to cancer in Stromal and Epithelial region.**
